# Supplementary material for: Lithium Aspartate for Long COVID Fatigue and Cognitive Dysfunction: A Randomized Clinical Trial
Source: PubMed Central journal article supplement (PMC11447566; doi:10.1001/jamanetworkopen.2024.36874), 2024-10-02
Supplement: jamanetwopen-e2436874-s003.pdf [file jamanetwopen-e2436874-s003.pdf]

## Data Sharing Statement

Guttuso, Jr. Lithium Aspartate for Long COVID Fatigue and Cognitive Dysfunction. *JAMA Netw Open*. Published October 02, 2024. doi:10.1001/jamanetworkopen.2024.36874

### Data

**Data available:** Yes

**Data types:** Deidentified participant data

**How to access data:** [tguttuso@buffalo.edu](mailto:tguttuso@buffalo.edu)

**When available:** With publication

### Supporting Documents

**Document types:** None

### Additional Information

**Who can access the data:** Researchers whose proposed use of the data has been approved.

**Types of analyses:** Any approved secondary analyses.

**Mechanisms of data availability:** After approval of a proposal.

**Any additional restrictions:** None.
